# Supplementary material for: A Central Role for Carbon-Overflow Pathways in the Modulation of Bacterial Cell Death
Source: PubMed Central journal article supplement (PMC4063974; doi:10.1371/journal.ppat.1004205), 2014-06-19

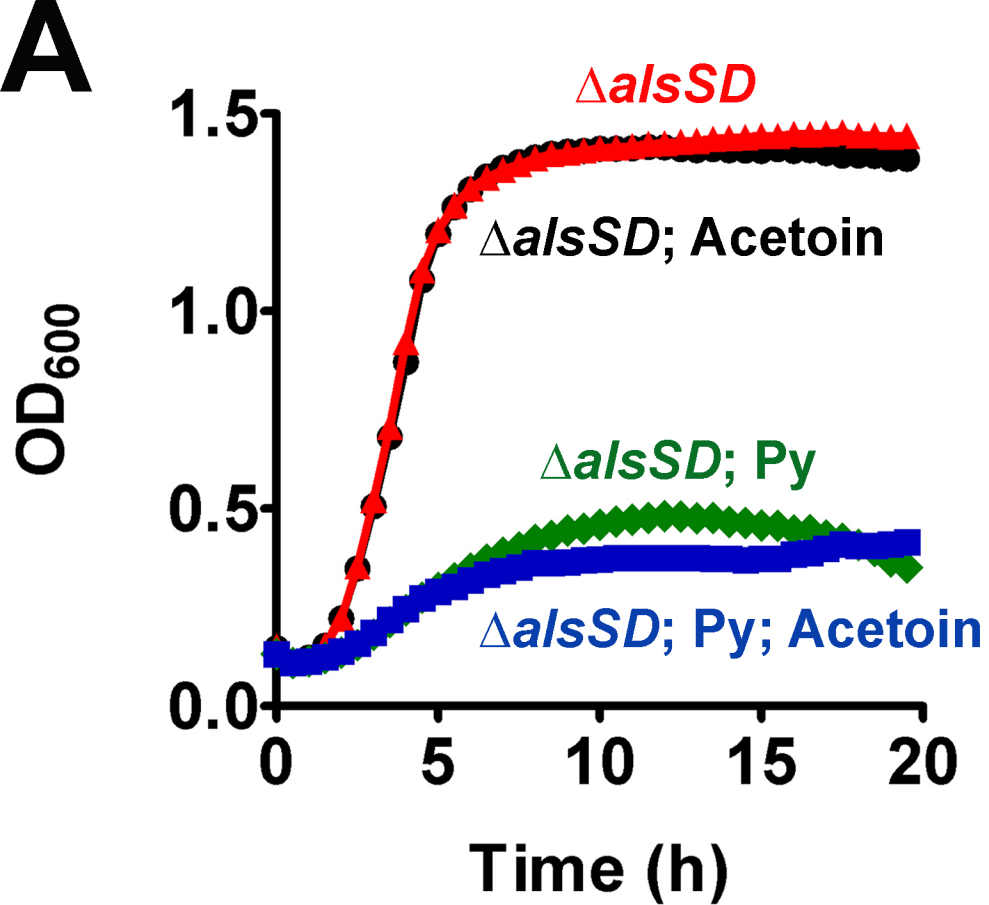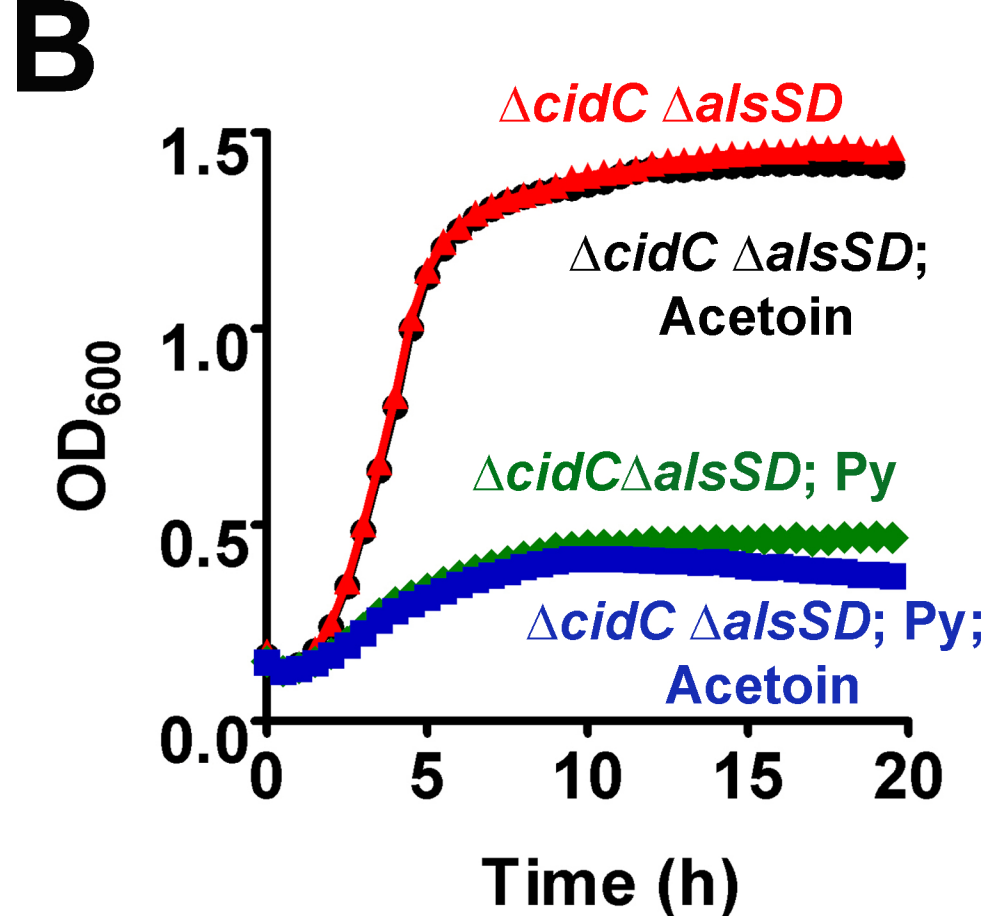

Supplement: ppat.1004205.s005.pdf [file ppat.1004205.s005.pdf]
